1 **Inconsistent estimates of hybridization frequency in newts revealed by SNPs and**  
2 **microsatellites**

3 Aurélien Miralles<sup>1,2</sup>, Jean Secondi<sup>3,4</sup>, Maciej Pabijan<sup>5</sup>, Wiesław Babik<sup>6</sup>, Christophe Lemaire<sup>7</sup>,  
4 Pierre-André Crochet<sup>8</sup>

5

6 <sup>1</sup>Zoological Institute, Braunschweig University of Technology, Mendelssohnstr. 4,  
7 Braunschweig, 38106, Germany

8 <sup>2</sup>Institut de Systématique, Evolution, Biodiversité, (UMR 7205 Muséum National d'Histoire  
9 Naturelle, CNRS UPMC EPHE, Sorbonne Universités), CP30, 25 Rue Cuvier, 75005, Paris,  
10 France

11 <sup>3</sup>Univ Lyon, Université Claude Bernard Lyon 1, CNRS, ENTPE, UMR 5023 LEHNA, F-  
12 69622, Villeurbanne, France

13 <sup>4</sup>Faculté des Sciences, Université d'Angers, 2 Bd de Lavoisier, 49000 Angers, France

14 <sup>5</sup>Institute of Zoology and Biomedical Research, Faculty of Biology, Jagiellonian University,  
15 Gronostajowa 9, 30-387 Kraków, Poland

16 <sup>6</sup>Institute of Environmental Sciences, Faculty of Biology, Jagiellonian University,  
17 Gronostajowa 7, 30-387 Kraków, Poland

18 <sup>7</sup>Université d'Angers, Institut Agronomique Rennes-Angers, INRAE, IRHS, SFR, QUASAV,  
19 49000 Angers, France.

20 <sup>8</sup>CEFE, CNRS, Univ Montpellier, EPHE, IRD, Montpellier, France

21

22

23

24

25 **Key words.** Broad sympatry, introgression, *Lissotriton vulgaris*, *Lissotriton helveticus*,  
26 SEQUENOME

27

28 **Abstract**

29 Hybridization between the European smooth and palmate newts has recurrently been  
30 mentioned in the literature. The only two studies that attempted to quantify the frequency of  
31 hybridization and gene admixture between these two species came to strikingly opposite  
32 conclusions. According to Arntzen et al (1998, 42 allozymes), hybrids are rare in nature and  
33 introgression negligible, while according to Johanet et al (2011, 6 microsatellites),  
34 introgressive hybridization is significant and widespread across the shared distribution range.  
35 To clarify this question, we implemented high-throughput SNP genotyping with diagnostic  
36 biallelic SNPs on 965 specimens sampled across Europe. Our results are in line with Arntzen  
37 et al, since only two F1 hybrids were identified in two distinct French localities, and no  
38 further hybrid generations or backcrosses. Moreover, reanalysis of 78 of the samples  
39 previously studied by Johanet et al. (2011) using our SNPs panel could not reproduce their  
40 results, suggesting that microsatellite-based inference overestimated the hybridization  
41 frequency between these two species. Since we did not detect methodological issues with the  
42 analyses of Johanet et al., our results suggest that SNP approaches outperform microsatellite-  
43 based assessments of hybridization frequency, and that conclusions previously published on  
44 this topic with a small number of microsatellite loci should be taken with caution, and ideally  
45 be repeated with an increased genomic coverage.

46

## 47 **Introduction**

48 Introgressive hybridization is a process of major interest for evolutionary biology. By blurring  
49 the lines between species, interspecific gene flow reveals the gradual nature of reproductive  
50 isolation and its possible reversibility, complicates species delimitation, and more generally  
51 calls into question the centuries-old categorical conception we may have of species (Taylor et  
52 al. 2006, Harrison & Larson 2014, Barraclough & Humphreys 2015, Moran et al. 2021, Kim  
53 et al. 2022). The transfer, *via* hybridization and backcrossing, of novel alleles from one  
54 species into the gene pool of another species also constitutes a non-negligible source of  
55 genetic diversity, which may positively or negatively impact the adaptive capacities of species  
56 (Barton 2001, Pfenning et al. 2016, Seabra et al. 2019, Steensels et al. 2021, Wacker et al.  
57 2021). Importantly, anthropogenic hybridization is increasingly common and its impact on  
58 conservation issues has been the topic of much debate (Chan et al. 2019, Mc Farelane &  
59 Pemberton 2019, Hirashiki et al. 2021).

60 Hybridization in animals has for a long time been considered as an anecdotal phenomenon,  
61 but in recent years, a growing body of evidence has demonstrated that a broad range of animal  
62 species experience it during their history (Mayr 1963, Mallet 2005, Taylor & Larson 2019,  
63 Adavoudi & Pilot 2022). In amphibians, introgressive hybridization has been documented in  
64 numerous anurans (e.g. Dufresnes et al. 2021), possibly as a result of their frequently external  
65 fertilization reducing the efficiency of pre-zygotic reproductive barriers. In Eurasian Urodela  
66 (with internal fertilization), several well documented examples have been reported in the  
67 genera *Triturus* (Jehle et al. 2001, 2009, 2021, Cogălniceanu et al. 2020) and *Lissotriton*,  
68 where *L. vulgaris* and *L. montandoni* exhibit some dramatic genomic consequences of past  
69 introgression (Babik et al. 2003, 2005, Babik & Rafiński 2004, Gherghel *et al.* 2012, Zieliński  
70 et al 2013, 2014, 2016, Pabijan *et al.* 2017, Niedzicka *et al* 2017, 2020, Dudek *et al.* 2019).  
71 Prior to these works, several sources (Griffiths 1987, Arntzen et al 1998, Beebee et al. 1999,

72 Schlüpmann et 1999) have also mentioned hybridization between the smooth and palmate  
73 newts, *Lissotriton vulgaris* and *L. helveticus*, two distantly related and non-sister species  
74 within the genus that diverged from each other relatively early (the divergence is imprecisely  
75 estimated between ~15 Mya and 24 Mya (Rage & Bailon 2005, Steinfartz et al. 2007, Böhme  
76 2010, Arntzen et al 2015)). The first work aiming at quantifying the extent of hybridization  
77 between these two species was based on multivariate analyses of 16 morphological traits and  
78 electrophoretic analyses of 42 protein loci (Arntzen et al. 1998). Although this work  
79 irrefutably demonstrated natural hybridization between *L. vulgaris* and *L. helveticus*, it  
80 concluded that this phenomenon was rare (only one F1 hybrid identified from a large sample  
81 (>5,000) of larvae, recently metamorphosed newts and adults) and no introgression was  
82 detected between the species (cf. Fig. 3 of Arntzen et al.). More recently, and in striking  
83 contrast to this first work, Johanet et al. (2011) used mitochondrial and microsatellite markers  
84 on ~1,300 individuals from 37 sites across Europe and concluded that introgression was  
85 instead relatively widespread in the area of sympatry, with a frequency of hybridization of  
86 1.7% and significant levels of introgression detected at most sites (73%) shared by both  
87 species. To determine the extent of hybridization and introgression between *L. vulgaris* and *L.*  
88 *helveticus* and to elucidate the causes of the discrepancy between the former studies, we  
89 reinvestigated the frequency of hybridization between the two species, using extended  
90 geographical sampling and, for the first time, high-throughput SNP genotyping.

91

## 92 **Material and methods**

93 *Sampling* . — Currently, *Lissotriton vulgaris* has a broad Eurasian distribution, whereas *L.*  
94 *helveticus* is restricted to the western part of Europe (Wielstra et al. 2018; Sillero et al., 2014).  
95 Both species occur sympatrically across a wide area including Great Britain, the north of

96 France, Switzerland, the Benelux countries and the west of Germany (Fig 1). Designed to take  
97 into account their respective distribution, our sampling includes a total of 965 individuals  
98 from 59 localities (=ponds): 29 samples from 11 allopatric localities for *L. helveticus* (in  
99 Spain and southern part France), 23 samples from 8 allopatric localities for *L. vulgaris* (in  
100 Norway, Sweden, Poland, Romania and Hungary), and 913 samples of both species from 40  
101 sympatric localities (in Great Britain and northern France), of which 829 are from 32  
102 localities where both species co-occur in syntopy (see Fig. 1 and Table 1). All these samples  
103 were collected during the reproductive phase (aquatic phase) and therefore correspond to  
104 viable adult individuals. Notably, our survey also includes a selection of 78 syntopic  
105 individuals that were previously analyzed using microsatellites by Johanet et al. (2011),  
106 including those that showed the most substantial rates of introgression.

107 *Single-nucleotide polymorphism (SNP)*. — DNA extractions were done on 96 well plates with  
108 the DNeasy blood and tissues kit (QUIAGEN). DNA extracts were diluted to obtain a target  
109 concentration of 10-15ng/μL. To identify a set of candidate diagnostic SNPs, we used a total  
110 of 1380 nuclear ORF contigs/alignments from transcriptomic data for *L. vulgaris* and *L.*  
111 *montandoni* (Stuglik & Babik 2016). Each of these 1380 alignments encompassed the same  
112 13 individuals: six *L. vulgaris* from Romania and Poland), six *L. montandoni* from Romania  
113 and Poland) and one *L. helveticus* from France (cf. Supplementary Table 1).

114 For population-level genotyping, we selected the MassARRAYray System approach  
115 (Sequenom). The MassArray assay consists of an initial locus-specific PCR reaction,  
116 followed by single base extension using mass-modified dideoxynucleotide terminators of an  
117 oligonucleotide primer which anneals immediately upstream of the polymorphic site of  
118 interest. Using MALDI-TOF mass spectrometry, the distinct mass of the extended primer  
119 identifies the SNP allele. This technology can genotype a SNP only if it presents biallelic  
120 variability and conserved upstream and downstream sequences of about 100 bp each (cf.

121 Gabriel & Ziaugra (2004) and Gabriel et al. (2009) for more details about the Sequenom  
122 MassARRAY technology). Among the 1380 alignments examined, only 127 presented  
123 sequences meeting the above mentioned specifications and were used to develop 127  
124 multiplexable candidate probes that were preliminarily tested on 20 *L. vulgaris* and 20 *L.*  
125 *helveticus* from different allopatric localities, in Poland (Krakow), Hungary (Pilisz mount and  
126 Budapest), Romania (Apuseni), Norway and Sweden for *L. vulgaris*, and Spain (Escobedo,  
127 Fresnedo and Poza de la Sal) and the southern part of France (Dordogne, Cazevielle,  
128 Ferrières-les-Verries, Notre-Dame-de-Londres and Aumelas) for *L. helveticus*. This screening  
129 phase enabled the extraction of 39 SNPs presenting a low amount of missing data and  
130 unambiguously distinguishing *L. vulgaris* from *L. helveticus* (cf. Supplementary Table 2 for  
131 the sequences of these probes). The selected alignments were used to design a 39-plex array  
132 to genotype the 1035 samples. The genotyping was subcontracted to the Genome  
133 Transcriptome facility at the Center for Functional Genomics in Bordeaux (CGFB), France.

134

135 *Population structure.* — Sample allocation and admixture level based on the 39 SNPs dataset  
136 were assessed with STRUCTURE v2.2 (Pritchard et al. 2000, Falush et al 2003) under models  
137 assuming two populations ( $K=2$ ). STRUCTURE has been shown to be less sensitive to the  
138 proportion of hybrids included in the sample, while NEWHYBRIDS (another widely used  
139 population genetic programs to address questions related to genetic structure, admixture, and  
140 hybridization, Anderson & Thompson 2002) seems to perform slightly better when  
141 individuals from both backcross and  $F_1$  hybrid classes are present in the sample (Vähä &  
142 Primmer, 2006). STRUCTURE assigns individuals probabilistically to clusters based on their  
143 multilocus genotype. We estimated posterior distributions based on 3 million MCMC  
144 generations of which 50% were discarded as burnin. We used a model that considers the  
145 possibility of mixed population ancestry and of correlated allele frequencies among

146 populations due to migration or shared ancestry (Falush et al 2003), with an alpha value of 1/k  
147 (0.5) (Wang 2017). For comparison, the same analyses were repeated on the microsatellite  
148 dataset generated by Johanet et al. (2011, six loci: Tv3ca9, Th09, Tv3Ca19, Th14, Th27,  
149 Thca14), to compare membership coefficients of the 78 specimens for which both SNP and  
150 microsatellite data were generated. We used the same options for the microsatellite dataset as  
151 with the SNPs.

152

### 153 **Results.**

154 Samples with three or more missing SNP loci (70 samples) were discarded from the dataset,  
155 leading to a final biallelic SNP data-set for 965 usable individual newts, with only 5.3% of  
156 missing data (4,256 undetermined SNP genotypes out of a total of 80,730). From the 39  
157 selected SNPs, two showed shared alleles at significant frequencies: SNP 10797 and SNP  
158 10913. For both loci, the “vulgaris” allele was found in *Lissotriton helveticus* in low  
159 frequencies that were similar between syntopic (3.3% for SNP 10797 and 13.2% for SNP  
160 10913) and allopatric populations (4.0% and 20.0%, respectively); these two loci are thus not  
161 fully diagnostic. In spite of this, the SNPs allowed specific discrimination of every sample,  
162 including newly collected as well as previously studied by Johanet et al (2011), and no  
163 significant sign of introgression between species was detected, i.e., species-specific alleles of  
164 one species were not found in the other. Only two samples collected in two syntopic localities  
165 in France revealed an F1-hybrid genotype: one (sample T9-12-LH8f-2, from Roissy-en-Brie)  
166 is heterozygous (*vh*) for 37 SNP loci (homozygous for the two remaining SNP loci, one of *vv*  
167 type and one *hh* type) and a second sample (T36-14-24-1, from Ecordal) is heterozygous for  
168 all the 38 SNP loci available (genotype at one locus missing). No other signs of hybridization  
169 or introgression were detected (Fig. 2A and Table 1).

170 In contrast with the SNP-based results, the sample allocation and admixture level presently  
171 inferred from the microsatellite dataset previously generated by Johannet et al (2011) suggest  
172 a substantial admixture of genes from the other species (i.e.,  $\geq 0.1$ ) for 11 of the 78 samples  
173 presently reanalyzed with SNPs, in accordance with the results of the original publication  
174 (See Figure 2B and Supplementary Table 3 for a comparison, for the same 78 samples, of the  
175 admixture levels inferred from microsatellites and SNP, respectively).

176

## 177 **Discussion.**

178 These results confirm the conclusions of Arntzen et al (1998): *Lissotriton helveticus* and *L.*  
179 *vulgaris* can hybridize in nature but this phenomenon remains rare, as we found only two F1  
180 individuals out of a total of 829 adults from syntopic populations. Such hybrids are likely  
181 sterile as we detected no signs of introgression between both species. In addition, SNP  
182 analyses of 78 of the samples previously analysed by Johannet et al. (2011), including samples  
183 identified as admixed individuals by microsatellite genotypes, detected no sign of  
184 hybridization either, suggesting that detection of hybridization and introgression with  
185 microsatellites produced biased results that overestimated the frequency of hybridization  
186 between these two species (Fig. 2B). The lack of introgression is consistent with the  
187 maintenance of a broad sympatric zone and supports the hypothesis that convergence of  
188 certain color traits (dorsum, tail) observed in sympatry would primarily be the result of plastic  
189 or adaptive responses to environmental variables and not introgression (de Solan et al. 2022).  
190 This result also echoes the findings of Drillon et al. (2019) who found hardly any  
191 hybridization and no introgression between *Hyla* tree frog species that diverged around 20  
192 Mya. Yet, the possibility of introgressive hybridization can persist for a very long time in  
193 newts, as exemplified by *Triturus cristatus* and *T. marmoratus* that hybridize frequently and  
194 can still exchange genes in spite of their divergence estimated at around 24 Mya (Wielstra et



195 al. 2011, Arntzen et al. 2021, comparable with the timing of divergence between *L. vulgaris*  
196 and *L. helveticus* presented in introduction).

197 An alternative explanation would be that the SNP genotyping underestimated hybridization  
198 and introgression, whereas the microsatellites returned the correct pattern of admixture. Our  
199 SNP loci have been selected to be (near) perfectly diagnostic (fixed alternative alleles in both  
200 species) and might therefore over-represent genomic regions highly differentiated between  
201 species, and thus, indirectly, genes involved in barriers to gene flow (which, by counter-  
202 selection, would be less likely to introgress in the long term in other species). On the contrary,  
203 microsatellites have been designed and selected independently of their level of divergence  
204 between species and should thus not overrepresent genomic regions that resist introgression.  
205 This hypothesis could be valid if the microsatellite results were able to detect long-term  
206 (historical) interspecific gene flow, as this would indeed be reduced in genomic regions  
207 involving barrier loci. However it does not apply to the detection of recent admixture (F1  
208 hybrids and backcrosses), in which case the SNP results are expected to be more robust than  
209 the microsatellite results due to a larger number of loci (and unambiguous allelic assignment)  
210 in the former. Thus, this hypothesis does not seem able to explain the low frequency of F1s  
211 and the total absence of F2 or backcrosses in the SNP dataset, in contradiction with the  
212 previous study based on microsatellites.

213 It thus seems more likely that the microsatellite analyses by Johanet et al. (2011) led to an  
214 overestimation of introgression. In general, SNPs have recurrently been shown to outperform  
215 microsatellites (e.g. Camacho-Sanchez et al. 2020, Bradbury et al. 2015, Hoffman et al. 2014,  
216 Lemopoulos et al. 2019, Sunde et al. 2020, Zimmerman et al. 2020, Szatmári et al. 2021),  
217 although it should be emphasized that these works most often involved a far greater number  
218 of SNP loci than in the present study (i.e. hundreds or thousands of SNPs *versus* 39 SNPs).  
219 More specifically, several recent studies comparing relative performance of SNPs and

220 microsatellites for hybridization detection effectiveness have shown that many hybrids  
221 indicated by microsatellites are not validated by SNPs (Daïnou et al. 2017, Szatmári et al,  
222 2020). Assessment of hybridization usually rests, as in the present case, on statistical  
223 estimation of the likelihood to observe a given multilocus genotype in a population  
224 (assignment methods such as STRUCTURE or NEWHYBRIDS) or comparisons of  
225 multivariate axes scores (Johannet et al. 2011, present study). These assignment methods can  
226 produce unreliable results when a small number of microsatellites are used or when there is  
227 too much missing data (Grünwald et al 2017, Hodel et al. 2017, Yi & Latch 2022). Analyses  
228 of datasets simulated under scenarios with different levels of genetic divergence and varying  
229 number of loci have for instance shown that two popular model-based Bayesian methods for  
230 detecting hybridization (i.e. STRUCTURE and NEWHYBRIDS) require a significantly  
231 higher number of loci than commonly applied in microsatellite-based studies (Vähä &  
232 Primmer 2006). According to this study, efficient detection of F<sub>1</sub> hybrid individuals would  
233 require for instance the use of 12 or 24 loci (for pairwise  $F_{ST}$  between hybridizing parental  
234 populations of 0.21 or 0.12, respectively), and separating backcrosses from pure individuals  
235 would require an even more significant genotyping effort ( $\geq 48$  loci, even when divergence  
236 between parental populations are high). In addition to the frequently low number of loci  
237 usually involved in microsatellites studies ( $n = 6$  in Johannet et al. 2011), it should be noted  
238 that these markers are also notoriously difficult to use to assess hybridization because they are  
239 highly polymorphic (from 12 to 35 alleles per locus, with an average of 25 alleles in both  
240 species in Johannet et al. 2011) which, coupled with homoplasy, often result in a lack of  
241 diagnostic loci (Putman & Carbone 2014, Daïnou et al. 2017, Šarhanová, et al. 2018).  
242 Additionally, the study by Johannet et al. (2011) was affected by a significant amount of  
243 microsatellite missing data (22.2% for the original dataset). Within the 1924 samples  
244 involved, 41.8% were missing at least one third of the data (i.e., 2 or 3 loci out of a total of

245 six) and 11.4% were missing half of the data (i.e., 3 out of 6). When focusing on those  
246 samples reanalyzed with SNPs, for which microsatellites suggested substantial admixture of  
247 genes from the other species (i.e.,  $\geq 0.1$ ,  $n=11$ ), examination of the raw data revealed that all  
248 of them had at least one missing locus, with an overall mean amount of missing data reaching  
249 34.8%.

250 Taken together, these considerations prompt us to conclude that the most parsimonious  
251 explanation for the discrepancy between Johanet et al. (2011) on the one hand, and Arntzen et  
252 al. (1998) and the present study on the other hand, is the poor performance of  
253 NEWHYBRIDS (microsatellite analysis by Johanet et al. 2011) and STRUCTURE  
254 (reanalysis of the same dataset in the present study) to reliably assess ancestry on the basis of  
255 an inadequate dataset, characterized both by a small number of hypervariable microsatellite  
256 loci and a substantial amount of missing data.

257 Over the past decades, microsatellite genotyping has been the approach favored by the  
258 research community to look for hybridization between non-model species. The present study  
259 suggests that many of these works may have suffered from biases like those encountered by  
260 Johanet et al (2011), and may have overestimated the frequency of this phenomenon, as was  
261 the case here. The conclusions from these studies, and the subsequent works based on them,  
262 should therefore be carefully reconsidered in the light of their respective datasets coverage.  
263 By providing a broad coverage of loci, including diagnostic loci, genomic approaches (such  
264 as the SNP approach of the present study) would certainly represent preferable alternatives to  
265 microsatellite approaches to investigate introgressive hybridization, and should contribute to  
266 refining our understanding about the extent of this phenomenon in nature.

267

268 **Acknowledgments.**

269 We are grateful to Erwan Guichoux (CGFB) and Patricia Sorouille (CEFE) for their technical  
270 support.

271

272 **Author contribution statement:**

273 P.A.C. and J.S. designed the research concept and realized most of the field work, A.M.  
274 performed data extraction and analyses. A.M. and P.A.C wrote the manuscript with  
275 contributions to all authors. All authors have read and validated the final version of the  
276 manuscript.

277

278 **Conflict of Interests:** The authors have no competing financial interests to declare.

279

280 **Data archiving :** The SNP raw dataset (newly generated) and the microsatellites raw dataset  
281 (by Johanet et al. 2011) that support the findings of this study are available in [repository  
282 name , DOI(s)] [Cf. XLS files in attachment. To be deposited upon manuscript acceptance].

283

284 **Supplementary Information:**

285 Supplementary Table 1. List of samples used to identify a set of candidate diagnostic SNPs.

286 Supplementary Table 2. List and sequences of the 39 DNA probes used for SNP genotyping.

287 Supplementary Table 3. Assignment coefficients obtained by STRUCTURE for the 78

288 specimens of *Lissotriton helveticus* (*Lh*) and *L. vulgaris* (*Lv*) living in sympatry and for which  
289 both microsatellites and SNP analyses could be performed.

290

291

292 **Bibliography**

- 293 Adavoudi R, Pilot M (2022) Consequences of Hybridization in Mammals: A Systematic  
294 Review. *Genes* 13:50. <https://doi.org/10.3390/genes13010050>
- 295 Anderson E, Thompson E (2002) A model-based method for identifying species hybrids using  
296 multilocus genetic data. *Genetics* 160:1217–1229.  
297 <https://doi.org/10.1093/genetics/160.3.1217>.
- 298 Arntzen JW, Beukema W, Galis F, Ivanović A (2015) Vertebral number is highly evolvable  
299 in salamanders and newts (family Salamandridae) and variably associated with climatic  
300 parameters. *Contrib Zool* 84:85–113. <https://doi.org/10.1163/18759866-08402001>
- 301 Arntzen JW, de Wijer P, Jehle R, Smit E, Smit J (1998) Rare hybridization and introgression  
302 in smooth and palmate newts (Salamandridae: *Triturus vulgaris* and *T. helveticus*). *J Zoolog*  
303 *Syst Evol* 36:111–122. <https://doi.org/10.1111/j.1439-0469.1998.tb00830.x>
- 304 Arntzen JW, Jehle R, Bardakci F, Burke T, Wallis GP (2009) Asymmetric viability of  
305 reciprocal cross hybrids between crested and marbled newts (*Triturus cristatus* and *T.*  
306 *marmoratus*). *Evolution* 63:1191–1202. <https://doi.org/10.1111/j.1558-5646.2009.00611.x>
- 307 Arntzen JW, Jehle R, Wielstra B (2021) Genetic and morphological data demonstrate  
308 hybridization and backcrossing in a pair of salamanders at the far end of the speciation  
309 continuum. *Evol Appl* 14:2784–2793. <https://doi.org/10.1111/eva.13312>
- 310 Babik W, Rafiński J (2004) Relationship between morphometric and genetic variation in pure  
311 and hybrid populations of the smooth and Montandon's newt (*Triturus vulgaris* and *T.*  
312 *montandoni*). *J Zool* 262:135–143. <https://doi.org/10.1017/S0952836903004369>
- 313 Babik W, Szymura JM, Rafiński J (2003) Nuclear markers, mitochondrial DNA and male  
314 secondary sexual traits variation in a newt hybrid zone (*Triturus vulgaris* × *T. montandoni*).  
315 *Mol Ecol* 12:1913–1930. <https://doi.org/10.1046/j.1365-294x.2003.01880.x>

- 316 Babik W, Branicki W, Crnobrnja-Isailović J, Cogălniceanu D, Sas I, Olgun K, Poyarkov NA,  
317 Garcia-París M, Arntzen JW (2005) Phylogeography of two European newt species  
318 discordance between mtDNA and morphology. *Mol Ecol* 14:2475–2491.  
319 <https://doi.org/10.1111/j.1365-294X.2005.02605.x>.
- 320 Barraclough TG, Humphreys AM (2015) The evolutionary reality of species and higher taxa  
321 in plants: a survey of post-modern opinion and evidence. *New Phytol* 207:291–296.  
322 <https://doi.org/10.1111/nph.13232>
- 323 Barton NH (2001) The role of hybridization in evolution. *Mol Ecol* 10:551–568.  
324 <https://doi.org/10.1046/j.1365-294x.2001.01216.x>
- 325 Beebee TJC, Rowe G, Arntzen JW (1999) Identification of newts (*Triturus* sp.) and their  
326 hybrids using molecular methods. *J Zool* 249:43–47. doi: [10.1111/j.1469-](https://doi.org/10.1111/j.1469-7998.1999.tb01058.x)  
327 [7998.1999.tb01058.x](https://doi.org/10.1111/j.1469-7998.1999.tb01058.x)
- 328 Böhme M (2010) Ectothermic vertebrates (Actinopterygii, Allocaudata, Urodela, Anura,  
329 Crocodylia, Squamata) from the Miocene of Sandelzhausen (Germany, Bavaria) and their  
330 implications for environment reconstruction and palaeoclimate. *Palaontol Z* 84:3–41.  
331 <https://doi.org/10.1007/s12542-010-0050-4>
- 332 Bradbury IR, Hamilton LC, Dempson B, Robertson MJ, Bourret V, Bernatchez L, Verspoor E  
333 (2015) Transatlantic secondary contact in Atlantic Salmon, comparing microsatellites, a  
334 single nucleotide polymorphism array and restriction-site associated DNA sequencing for the  
335 resolution of complex spatial structure. *Mol Ecol* 24:5130– 5144.  
336 <https://doi.org/10.1111/mec.13395>
- 337 Camacho-Sanchez M, Velo-Antón G, Hanson JO, Veríssimo A, Martínez-Solano Í, Marques  
338 A, Moritz C, Carvalho SB (2020) Comparative assessment of range-wide patterns of genetic  
339 diversity and structure with SNPs and microsatellites: A case study with Iberian amphibians.  
340 *Ecol Evol* 10:10353– 10363. <https://doi.org/10.1002/ece3.6670>

- 341 Chan WY, Hoffmann AA, van Oppen MJH (2019) Hybridization as a conservation  
342 management tool. *Conserv Lett* 12:e12652. <https://doi.org/10.1111/conl.12652>
- 343 Cogălniceanu D, Stănescu F, Arntzen JW (2020) Testing the hybrid superiority hypothesis in  
344 crested and marbled newts. *J Zool Syst Evol Res* 58:275– 283.  
345 <https://doi.org/10.1111/jzs.12322>
- 346 Dainou K., Flot JF, Degen B, Blanc-Jolivet C, Doucet JL, Lassois L, Hardy OJ (2017) DNA  
347 taxonomy in the timber genus *Milicia*: evidence of unidirectional introgression in the West  
348 African contact zone. *Tree Genet Genomes* 13: 90. [https://doi.org/10.1007/s11295-017-1174-](https://doi.org/10.1007/s11295-017-1174-4)  
349 [4](https://doi.org/10.1007/s11295-017-1174-4)
- 350 de Solan T, Théry M, Picard D, Crochet P-A, David P, Secondi J (2022) A lot of  
351 convergence, a bit of divergence: Environment and interspecific interactions shape body  
352 colour patterns in *Lissotriton* newts. *J Evol Biol* 35:575– 588.  
353 <https://doi.org/10.1111/jeb.13985>
- 354 Drillon O, Dufresnes G, Perrin N, Crochet P-A, Dufresnes C. (2019) Reaching the edge of the  
355 speciation continuum: hybridization between three sympatric species of *Hyla* tree frogs, *Biol*  
356 *J Linn Soc* 126:743–750. <https://doi.org/10.1093/biolinnean/bly198>
- 357 Dufresnes C, Brelsford A, Jeffries D, Mazepa G, Suchan T, Canestrelli D, Niecieza A,  
358 Fumagalli L, Dubey S, Martínez-Solano I, Litvinchuk S, Vences M, Perrin N, Crochet P-A.  
359 (2021) Mass of genes rather than master genes underlie the genomic architecture of  
360 amphibian speciation. *PNAS* 118:e2103963118. <https://doi.org/10.1073/pnas.2103963118>
- 361 Dudek K, Gaczorek TS, Zieliński P, Babik W (2019) Massive introgression of major  
362 histocompatibility complex genes in newt hybrid zones. *Mol Ecol* 28:4798– 4810.  
363 <https://doi.org/10.1111/mec.15254>
- 364 Falush D, Stephens M, Pritchard JK (2003) Inference of population structure using multilocus  
365 genotype data: linked loci and correlated allele frequencies. *Genetics* 164:1567–1587.

- 366 Gabriel S, Ziaugra L (2004) SNP genotyping using Sequenom MassARRAY 7K platform.  
367 Curr Protoc Hum Genet 2:2.12. <https://doi.org/10.1002/0471142905.hg0212s42>.
- 368 Gabriel S, Ziaugra L, Tabbaa D (2009) SNP genotyping using the Sequenom MassARRAY  
369 iPLEX platform. Curr Protoc Hum Genet.2:2.12.  
370 <https://doi.org/10.1002/0471142905.hg0212s60>.
- 371 Gherghel I, Strugariu A, Ambrosă I-M, Zamfirescu □ (2012) Updated distribution of hybrids  
372 between *Lissotriton vulgaris* and *Lissotriton montandoni* (Amphibia: Caudata:  
373 Salamandridae) in Romania. *Acta Herpeto* 7: 49–55. [https://doi.org/10.13128/Acta\\_Herpetol-](https://doi.org/10.13128/Acta_Herpetol-10224)  
374 [10224](https://doi.org/10.13128/Acta_Herpetol-10224)
- 375 Griffiths RA (1987) Microhabitat and seasonal niche dynamics of smooth and palmate newts,  
376 *Triturus vulgaris* and *T. helveticus*, at a pond in mid-Wales. *J Anim Ecol* 56:441–451.  
377 <https://doi.org/10.2307/5059>
- 378 Grünwald NJ, Everhart SE, Knaus BJ, Kamvar ZN (2017) Best Practices for Population  
379 Genetic Analyses. *Phytopathology* 107:1000–1010. [https://doi.org/10.1094/PHYTO-12-16-](https://doi.org/10.1094/PHYTO-12-16-0425-RVW)  
380 [0425-RVW](https://doi.org/10.1094/PHYTO-12-16-0425-RVW)
- 381 Harrison RG, Larson EL (2014) Hybridization, Introgression, and the Nature of Species  
382 Boundaries. *J Hered* 105:795–809, <https://doi.org/10.1093/jhered/esu033>
- 383 Hirashiki C, Kareiva P, Marvier M (2021) Concern over hybridization risks should not  
384 preclude conservation interventions. *Conserv Sci Pract* 3:e424.  
385 <https://doi.org/10.1111/csp2.424>
- 386 Hodel RGJ, Chen S, Payton AC, McDaniel SF, Soltis P, Soltis DE (2017) Adding loci  
387 improves phylogeographic resolution in red mangroves despite increased missing data:  
388 comparing microsatellites and RAD-Seq and investigating loci filtering. *Sci Rep* 7:17598.  
389 <https://doi.org/10.1038/s41598-017-16810-7>



390 Hoffman JI, Simpson F, David P, Rijks JM, Kuiken T, Thorne MAS, Lacy RC, Dasmahapatra  
391 KK (2014) High-throughput sequencing reveals inbreeding depression in a natural population.  
392 PNAS 111:3775. <https://doi.org/10.1073/pnas.1318945111>

393 Jehle R, Arntzen JW, Burke T, Krupa AP, Hödl W (2001). The annual number of breeding  
394 adults and the effective population size of syntopic newts (*Triturus cristatus*, *T. marmoratus*).  
395 Mol Ecol 10:839–850. <https://doi.org/10.1046/j.1365-294X.2001.01237.x>

396 Johanet A, Secondi J, Lemaire C (2011) Widespread introgression does not leak into allotopy  
397 in a broad sympatric zone. Heredity 106:962–972. <https://doi.org/10.1038/hdy.2010.144>

398 Kim D, Bauer BH, Near TJ (2022) Introgression and Species Delimitation in the Longear  
399 Sunfish *Lepomis megalotis* (Teleostei: Percomorpha: Centrarchidae). Syst Biol 71:273–285,  
400 <https://doi.org/10.1093/sysbio/syab029>

401 Lemopoulos A, Prokkola JM, Uusi-Heikkilä S, Vasemägi A, Huusko A, Hyvärinen P,  
402 Koljonen M-L, Koskiniemi J, Vainikka A (2019) Comparing RADseq and microsatellites for  
403 estimating genetic diversity and relatedness — Implications for brown trout conservation.  
404 Ecol Evol 9:2106–2120. <https://doi.org/10.1002/ece3.4905>

405 Mallet J (2005) Hybridization as an invasion of the genome. Trends Ecology Evol 20:229–  
406 237. <https://doi.org/10.1016/j.tree.2005.02.010>.

407 Mayr E (1963) *Animal Species and Evolution*. Belknap; Cambridge, MA, USA: 1963.

408 McFarlane SE, Pemberton JM (2019) Detecting the True Extent of Introgression during  
409 Anthropogenic Hybridization. Trends Ecol Evol 34:315–326.  
410 <https://doi.org/10.1016/j.tree.2018.12.013>.

411 Moran BM, Payne C, Langdon Q, Powell DL, Brandvain Y, Schumer M (2021) The genomic  
412 consequences of hybridization. eLife 10:e69016. <https://doi.org/10.7554/eLife.69016>

413 Niedzicka ME, Głowacki BM, Zieliński P, Babik W (2020). Morphology is a poor predictor  
414 of interspecific admixture – the case of two naturally hybridizing newts *Lissotriton*

- 415 *montandoni* and *Lissotriton vulgaris* (Caudata: Salamandridae). *Amphib Reptil* 41:489–500.  
416 <https://doi.org/10.1163/15685381-bja10019>
- 417 Niedzicka M, Dudek K, Fijarczyk A, Zieliński P, Babik W (2017). Linkage Map of  
418 *Lissotriton* Newts Provides Insight into the Genetic Basis of Reproductive Isolation. *G3: Genes Genomes Genet* 7:2115–2124. <https://doi.org/10.1534/g3.117.041178>.
- 420 Pabijan M, Zieliński P, Dudek K, Stuglik M, Babik W (2017). Isolation and gene flow in a  
421 speciation continuum in newts. *Mol Phylogenet Evol* 116:1–12.  
422 <https://doi.org/10.1016/j.ympev.2017.08.003>
- 423 Pfennig KS, Kelly AL, Pierce AA (2016) Hybridization as a facilitator of species range  
424 expansion. *Proc R Soc B* 283:20161329-9. <https://doi.org/10.1098/rspb.2016.1329>
- 425 Pritchard JK, Stephens M, Donnelly P (2000) Inference of population structure using  
426 multilocus genotype data. *Genetics* 155:945–959. <https://doi:10.1093/genetics/155.2.945>
- 427 Putman AI, Carbone I (2014) Challenges in analysis and interpretation of microsatellite data  
428 for population genetic studies. *Ecol Evol* 22:4399–4428. <https://doi:10.1002/ece3.1305>.
- 429 Rage JC & Bailon S (2005) Amphibians and squamate reptiles from the late early Miocene  
430 (MN 4) of Béon 1 (Montréal-du-Gers, southwestern France). *Geodiversitas* 27:413–441.
- 431 Šarhanová P, Pfanzelt S, Brandt R, Himmelbach A, Blattner FR (2018) SSR-seq: Genotyping  
432 of microsatellites using next-generation sequencing reveals higher level of polymorphism as  
433 compared to traditional fragment size scoring. *Ecol Evol* 8:10817– 10833.  
434 <https://doi.org/10.1002/ece3.4533>
- 435 Schlüpmann M, Weber G, Lipscher E, Veith M (1999) Nachweis eines freilandbastardes von  
436 Teichmolch (*Triturus vulgaris*) und Fadenmolch (*Triturus helveticus*). *Z Feldherpetol* 6:203–  
437 217.
- 438 Seabra, SG, Silva, SE, Nunes, VL, Sousa VC, Martins J, Marabuto E, Rodrigues ASB, Pina-  
439 Martins F, Laurentino TG, Rebelo MT, Figueiredo E, Paulo OS (2019) Genomic signatures of

440 introgression between commercial and native bumblebees, *Bombus terrestris*, in western  
441 Iberian Peninsula—Implications for conservation and trade regulation. *Evol Appl* 12:679–  
442 691. <https://doi.org/10.1111/eva.12732>

443 Secondi J, Johanet A, Pays O, Cazimajou F, Djalout Z, Lemaire C (2010) Olfactory and  
444 visual species recognition in newts and their role in hybridization. *Behaviour* 147:1693–1712.

445 Sillero N, Campos J, Bonardi A, Corti C, Creemers R, Crochet PA, Crnobrnja Isailović J,  
446 Denoël M, Ficetola GF, Gonçalves J, Kuzmin S, Lymberakis P, de Pous P, Rodríguez A,  
447 Sindaco R, Speybroeck J, Toxopeus B, Vieites DR, Vences M (2014) Updated distribution  
448 and biogeography of amphibians and reptiles of Europe. *Amphib Reptil* 35:1–31.  
449 <https://doi.org/10.1163/15685381-00002935>

450 Sunde J, Yildirim Y, Tibblin P, Forsman A (2020) Comparing the performance of  
451 microsatellites and RADseq in population genetic studies: Analysis of data for pike (*Esox*  
452 *lucius*) and a synthesis of previous studies. *Front Genet* 11:218.  
453 <https://doi.org/10.3389/fgene.2020.00218>

454 Steensels J, Gallone B, Verstrepen KJ (2021) Interspecific hybridization as a driver of fungal  
455 evolution and adaptation. *Nat Rev Microbiol* 19:485–500. [https://doi.org/10.1038/s41579-](https://doi.org/10.1038/s41579-021-00537-4)  
456 [021-00537-4](https://doi.org/10.1038/s41579-021-00537-4)

457 Steinfartz S, Vicario S, Arntzen JW, Caccone A (2007) A Bayesian approach on molecules  
458 and behavior: reconsidering phylogenetic and evolutionary patterns of the Salamandridae with  
459 emphasis on *Triturus* newts. *J Exp Zool B Mol Dev Evol.* 2308:139-62.  
460 <https://doi.org/10.1002/jez.b.21119>.

461 Stuglik MT, Babik W (2016) Genomic heterogeneity of historical gene flow between two  
462 species of newts inferred from transcriptome data. *Ecol Evol* 6:4513–4525,  
463 <https://doi.org/10.1002/ece3.2152>

464 Szatmári L, Cserkész T, Laczkó L, Lanszki J, Pertoldi C, Abramov AV, Elmeros M, Ottlecz  
465 B, Hegyeli Z, Sramkó G (2021) A comparison of microsatellites and genome-wide SNPs for  
466 the detection of admixture brings the first molecular evidence for hybridization between  
467 *Mustela eversmanii* and *M. putorius* (Mustelidae, Carnivora). *Evol Appl* 14:2286–2304.  
468 <https://doi.org/10.1111/eva.13291>

469 Taylor SA, Larson E (2019) Insights from genomes into the evolutionary importance and  
470 prevalence of hybridization in nature. *Nat Ecol Evol* 3:170–177. [doi: 10.1038/s41559-018-](https://doi.org/10.1038/s41559-018-0777-y)  
471 [0777-y](https://doi.org/10.1038/s41559-018-0777-y).

472 Taylor EB, Boughmann JW, Greonenboomm M, Sniatynksi D, Schluter D, Gow JL (2006)  
473 Speciation in reverse: morphological and genetic evidence of the collapse of a three-spined  
474 stickleback *Gasterosteus aculeatus*) species pair. *Mol Ecol* 15:343–355.

475 Vähä JP, Primmer CR (2006) Efficiency of model-based Bayesian methods for detecting  
476 hybrid individuals under different hybridization scenarios and with different numbers of loci.  
477 *Mol Ecol* 15:63–72. <https://doi.org/10.1111/j.1365-294X.2005.02773.x>

478 Wacker S, Aronsen T, Karlsson S, Ugedal O, Diserud OH, Ulvan EM, Hindar K, Næsje TF  
479 (2021) Selection against individuals from genetic introgression of escaped farmed salmon in a  
480 natural population of Atlantic salmon. *Evol Appl* 14:1450–1460.  
481 <https://doi.org/10.1111/eva.13213>

482 Wang J (2017) The computer program structure for assigning individuals to populations: easy  
483 to use but easier to misuse. *Mol Ecol Resour* 17:981–990. [https://doi.org/10.1111/1755-](https://doi.org/10.1111/1755-0998.12650)  
484 [0998.12650](https://doi.org/10.1111/1755-0998.12650)

485 Wielstra B, Arntzen JW (2011) Unraveling the rapid radiation of crested newts (*Triturus*  
486 *cristatus* superspecies) using complete mitogenomic sequences. *BMC Evol Biol* 11:162.  
487 <https://doi.org/10.1186/1471-2148-11-162>

488 Wielstra B, Canestrelli D, Cvijanović M, Denoël M, Fijarczyk A, Jablonski D, Liana M,  
489 Naumov B, Olgun K, Pabijan M, Pezzarossa A, Popgeorgiev G, Salvi D, Si Y, Sillero N,  
490 Sotiropoulos K, Zieliński P, Babik W (2018) The distributions of the six species constituting  
491 the smooth newt species complex (*Lissotriton vulgaris sensu lato* and *L. montandoni*)—an  
492 addition to the New Atlas of Amphibians and Reptiles of Europe. *Amphib Reptil* 39:252–259.

493 Yi X, Latch EK (2022) Nonrandom missing data can bias Principal Component Analysis  
494 inference of population genetic structure. *Mol Ecol Resour* 22:602– 611.  
495 <https://doi.org/10.1111/1755-0998.13498>

496 Zieliński P, Nadachowska-Brzyska K, Wielstra B, Szkotak R, Covaciu-Marcov SD,  
497 Cogălniceanu D, Babik W (2013) No evidence for nuclear introgression despite complete  
498 mtDNA replacement in the Carpathian newt (*Lissotriton montandoni*). *Mol Ecol* 22:1884–  
499 1903.

500 Zieliński P, Stuglik MT, Dudek K, Konczal M, Babik W (2014) Development, validation and  
501 high-throughput analysis of sequence markers in nonmodel species. *Mol.Ecol. Resour.* 14,  
502 352–360.

503 Zieliński P, Nadachowska-Brzyska K, Dudek K, Babik W (2016) Divergence history of the  
504 Carpathian and smooth newts modelled in space and time. *Mol. Ecol.* 25, 3912–3928.

505 Zimmerman SJ, Aldridge CL, Oyler-McCance SJ (2020) An empirical comparison of  
506 population genetic analyses using microsatellite and SNP data for a species of conservation  
507 concern. *BMC Genomics* 21, 382. <https://doi.org/10.1186/s12864-020-06783-9>  
508

| Sampling site (population field number)                | <i>Lissotriton helveticus</i>          |      | <i>Lissotriton vulgaris</i> |      | F1    |      | Coordinates |                    |
|--------------------------------------------------------|----------------------------------------|------|-----------------------------|------|-------|------|-------------|--------------------|
|                                                        | N                                      | F(h) | N                           | F(v) | N     | F(h) |             |                    |
| <u>Allopatric localities (<i>L. vulgaris</i> only)</u> |                                        |      |                             |      |       |      |             |                    |
| Hu.                                                    | Budapest hill (S27-13)                 | □    | □                           | 3    | 1     | □    | □           | 47.5764°N 8.8686°E |
|                                                        | Pilis mount (S24-13)                   | □    | □                           | 3    | 0.996 | □    | □           | 47.7294°N 9.0068°E |
| No.                                                    | Trondheim (Tpon-Nor)                   | □    | □                           | 3    | 0.991 | □    | □           | 63.9442°N 0.3552°E |
| Po.                                                    | Gartatowice.(S10-12)                   | □    | □                           | 4    | 1     | □    | □           | 50.5742°N 0.6239°E |
|                                                        | Krakow (S11-12)                        | □    | □                           | 2    | 1     | □    | □           | 50.0397°N 9.9176°E |
| Ro.                                                    | Coma, Apuseni mountains (S29-13)       | □    | □                           | 3    | 1     | □    | □           | 46.2831°N 3.1215°E |
|                                                        | Strâmba, Bistrita district (S30-13)    | □    | □                           | 3    | 1     | □    | □           | 47.2475°N 4.6533°E |
| Sw.                                                    | Sjöbo (TponSwe)                        | □    | □                           | 2    | 1     | □    | □           | 55.6729°N 3.7927°E |
|                                                        | <i>total</i>                           |      |                             | 23   | 0.998 |      |             |                    |
| <u>Allopatric site (<i>L. helveticus</i> only)</u>     |                                        |      |                             |      |       |      |             |                    |
| Fr.                                                    | Aumelas (T08-12).                      | 1    | 1                           | □    | □     | □    | □           | 43.5743°N 3.6442°E |
|                                                        | Causses du Quercy (PalQue)*            | 2    | 1                           | □    | □     | □    | □           | 44.2539°N 1.9702°E |
|                                                        | Cazevieille (T01-12).                  | 2    | 1                           | □    | □     | □    | □           | 43.7597°N 3.7772°E |
|                                                        | Dordogne, Montouleix (S37-07*, PalGir) | 5    | 0.995                       | □    | □     | □    | □           | 45.6450°N 0.5885°E |
|                                                        | Ferrières-les-Verreries (T02-12)       | 6    | 0.991                       | □    | □     | □    | □           | 43.8654°N 3.7828°E |
|                                                        | Ile d'Yeu (palYeu)                     | 2    | 1                           | □    | □     | □    | □           | 46.6955°N 2.3391°W |
|                                                        | ND-de-Londres (T04-12)                 | 2    | 0.987                       | □    | □     | □    | □           | 43.8339°N 3.7460°E |
| Sp.                                                    | Escobedo (S38-07)                      | 3    | 0.996                       | □    | □     | □    | □           | 43.3889°N 3.8853°W |
|                                                        | Fresnedo.(S36-07)                      | 4    | 0.993                       | □    | □     | □    | □           | 43.3652°N 4.1589°W |
|                                                        | Poza de la Sal (T31-13)                | 2    | 0.987                       | □    | □     | □    | □           | 42.6686°N 3.5288°W |
|                                                        | <i>total</i>                           | 29   | 0.994                       |      |       |      |             |                    |
| <u>Sympatric site without evidence of syntopy</u>      |                                        |      |                             |      |       |      |             |                    |
| Fr.                                                    | Ambleteuse, #330 (PalAm)*              | 4    | 1                           | 0    | □     | 0    | □           | 50.8086°N 1.6473°E |
|                                                        | Bois de l'Epinau, Bl.-Gohier (pal38)*  | 4    | 1                           | 0    | □     | 0    | □           | 47.4111°N 0.3977°W |
|                                                        | Ile St Aubin, Angers (pon44)*          | 0    | □                           | 4    | 1     | 0    | □           | 47.5123°N 0.5356°W |
|                                                        | Grande Synthe, Prédembourg (S3-12)     | 0    | □                           | 22   | 1     | 0    | □           | 51.0200°N 2.2811°E |
|                                                        | Orée du bois, Ahuillé (palOr)*         | 4    | 1                           | 0    | □     | 0    | □           | 48.7743°N 2.6588°E |
|                                                        | Ozoir -la-Ferrière (T10-12)            | 16   | 0.998                       | 0    | □     | 0    | □           | 48.7732°N 2.6561°E |
|                                                        | Rocan, Briquenai (PalAr)*              | 1    | 1                           | 0    | □     | 0    | □           | 49.3926°N 4.8432°E |
|                                                        | Zuydcoote (S2-12)                      | 0    | □                           | 29   | 1     | 0    | □           | 51.0633°N 2.4867°E |
|                                                        | <i>total</i>                           | 29   | 0.999                       | 55   | 1     | 0    |             |                    |
| <u>Sympatric site with evidence of syntopy</u>         |                                        |      |                             |      |       |      |             |                    |
| Fr.                                                    | Bazenville (palBaz)*                   | 3    | 1                           | 1    | 1     | 0    | ■           | 49.2835°N 0.5820°W |
|                                                        | Boire des Ecoilles, Liré (pal33)*      | 5    | 0.990                       | 6    | 0.998 | 0    | ■           | 47.3601°N 1.1380°W |
|                                                        | Bois Boureau (S35-11, S56-14, pal41)*  | 51   | 0.990                       | 10   | 1     | 0    | ■           | 47.4142°N 0.5428°W |
|                                                        | Notre Dame, Sucy-en-Brie (BDN3, 6)     | 3    | 1                           | 2    | 0.993 | 0    | ■           | 48.7591°N 2.6038°E |
|                                                        | Briollay, Nord (S9-12)                 | 7    | 0.994                       | 31   | 1     | 0    | ■           | 47.5707°N 0.5205°W |
|                                                        | Briollay, Sud (S05-12)                 | 0    |                             | 24   | 0.999 | 0    | ■           | 47.5636°N 0.5255°W |
|                                                        | Ecordal I (T35-14)                     | 29   | 0.997                       | 0    |       | 0    | ■           | 49.5291°N 4.6107°E |
|                                                        | Ecordal II (T36-14)                    | 10   | 0.999                       | 41   | 1     | 1    | 0.502       | 49.5257°N 4.5888°E |
|                                                        | Faisseault (T39-14)                    | 27   | 1                           | 3    | 1     | 0    | ■           | 49.5988°N 4.4802°E |
|                                                        | Launois sur Vence (T38-14)             | 5    | 1                           | 32   | 1     | 0    | ■           | 49.6854°N 4.5361°E |
|                                                        | Lorraine, Liverdun (P.Lor)*            | 4    | 1                           | 1    | 0.987 | 0    | ■           | 48.7462°N 6.0402°E |
|                                                        | Poix Terron (T37-14)                   | 23   | 1                           | 20   | 1     | 0    | ■           | 49.6460°N 4.6557°E |
|                                                        | Puisaye I (T40-14)                     | 24   | 0.996                       | 0    |       | 0    | ■           | 47.6271°N 3.1879°E |
|                                                        | Puisaye II (T41-14)                    | 30   | 0.994                       | 29   | 1     | 0    | ■           | 47.6379°N 3.1546°E |
|                                                        | Puisaye III (T42-14)                   | 29   | 0.995                       | 0    |       | 0    | ■           | 47.6382°N 3.2514°E |
|                                                        | Puisaye IV (T43-14)                    | 30   | 0.996                       | 1    | 1     | 0    | ■           | 47.6560°N 3.1984°E |
|                                                        | Puisaye V (T44-14)                     | 30   | 0.997                       | 25   | 1     | 0    | ■           | 47.6720°N 3.1820°E |
|                                                        | Roissy-en-Brie (T9-12)                 | 23   | 0.994                       | 18   | 1     | 1    | 0.502       | 48.7923°N 2.6812°E |
|                                                        | Denée (S57-14)                         | 30   | 0.993                       | 10   | 1     | 0    | ■           | 47.3957°N 0.6199°W |
|                                                        | St Jean de la Croix II (S58)           | 26   | 0.996                       | 21   | 1     | 0    | ■           | 47.4063°N 0.5945°W |

|    |                                |    |          |    |          |   |                                                                                     |                    |
|----|--------------------------------|----|----------|----|----------|---|-------------------------------------------------------------------------------------|--------------------|
|    | Signy l'abbaye I (T32-14)      | 21 | <i>I</i> | 1  | <i>I</i> | 0 |  | 49.7103°N 4.3794°E |
|    | Signy l'abbaye II (T33-14)     | 22 | <i>I</i> | 1  | <i>I</i> | 0 |  | 49.7214°N 4.3559°E |
|    | Signy l'abbaye III (T34-14)    | 27 | <i>I</i> | 1  | <i>I</i> | 0 |  | 49.7343°N 4.3892°E |
|    | St Germer de Fly I (S22-13)    | 13 | 0.993    | 4  | <i>I</i> | 0 |  | 49.4379°N 1.8087°E |
|    | St Germer de Fly, II (S20-13)  | 3  | 0.996    | 8  | <i>I</i> | 0 |  | 49.4383°N 1.8069°E |
|    | St Germer de Fly, III (S21-13) | 8  | 0.988    | 1  | <i>I</i> | 0 |  | 49.4377°N 1.8181°E |
|    | St Germer de Fly, IV (S19-13)  | 8  | 0.992    | 5  | <i>I</i> | 0 |  | 49.4375°N 1.8125°E |
|    | St Germer de Fly, V (PalBa)*   | 23 | 0.994    | 0  | <i>I</i> | 0 |  | 49.4399°N 1.8195°E |
|    | Varennes-sur-Loire I (pal43)*  | 4  | 0.997    | 3  | <i>I</i> | 0 |  | 47.2555°N 0.0110°E |
|    | Varennes-sur-Loire II (pal42)* | 3  | 0.987    | 4  | <i>I</i> | 0 |  | 47.2241°N 0.0732°E |
| UK | Offham Marshes (palOff)*       | 1  | <i>I</i> | 2  | <i>I</i> | 0 |  | 50.9167°N 0.0833°E |
|    | <i>total</i>                   | 52 | 0.996    | 30 | <i>I</i> | 2 |                                                                                     |                    |
|    |                                | 2  |          | 5  |          |   |                                                                                     |                    |

509

510 **Table 1.** Geographic sampling of *Lissotriton helveticus* and *L. vulgaris*. For each locality, the number of samples  
511 (N, assignment to a given species based on the present results) and the overall frequencies of the diagnostic  
512 alleles for each species (*F(h)* and *F(v)*, respectively) are indicated (only *F(h)* frequencies are indicated for the  
513 two hybrid specimens). Abbreviations : Hu. Hungary, No. Norway, Po. Poland, Ro, Romania, Sw. Sweden, Fr,  
514 France, Sp. Spain, UK. United Kingdom ; F1 represents putative F1 hybrids. Localities including samples  
515 already analysed by Johanet et al (2011) are indicated by an asterisk.

516

517

## FIGURE CAPTION

518 **Fig 1.** Population sampling. The red and blue areas indicate the approximate distribution of *Lissotriton*  
519 *helveticus* and *L. vulgaris*, respectively (sympatric distribution range represented in purple). Each white dot  
520 represents one or several sampled ponds from the same area (cf. Table 1 for details).

521

522 **Fig. 2.** Overview of the genetic structure using STRUCTURE (with K=2). (A) All the samples genotyped with  
523 SNPs are unambiguously assigned to one species or another (probability  $\geq 0.99$ ), except for two putative F1  
524 hybrid specimens assigned with a probability of 0.50 to both species. Only results from Ecordal (NE France)  
525 where one of the two hybrids was detected, are illustrated (cf. Table 1 for overall results). (B) Two alternative  
526 Bayesian clustering analyses based on the same set of samples from various localities illustrating the differences  
527 between microsatellite and SNP genotyping: the structure inferred from the microsatellite dataset suggests  
528 significant introgressive hybridization between both species (above, raw data from Johanet et al. 2011), whereas  
529 on the contrary, the structure inferred from the newly generated SNP dataset does not show any signs of  
530 admixture between species (below).

531

532



*L. vulgaris*

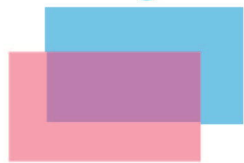

*L. helveticus*

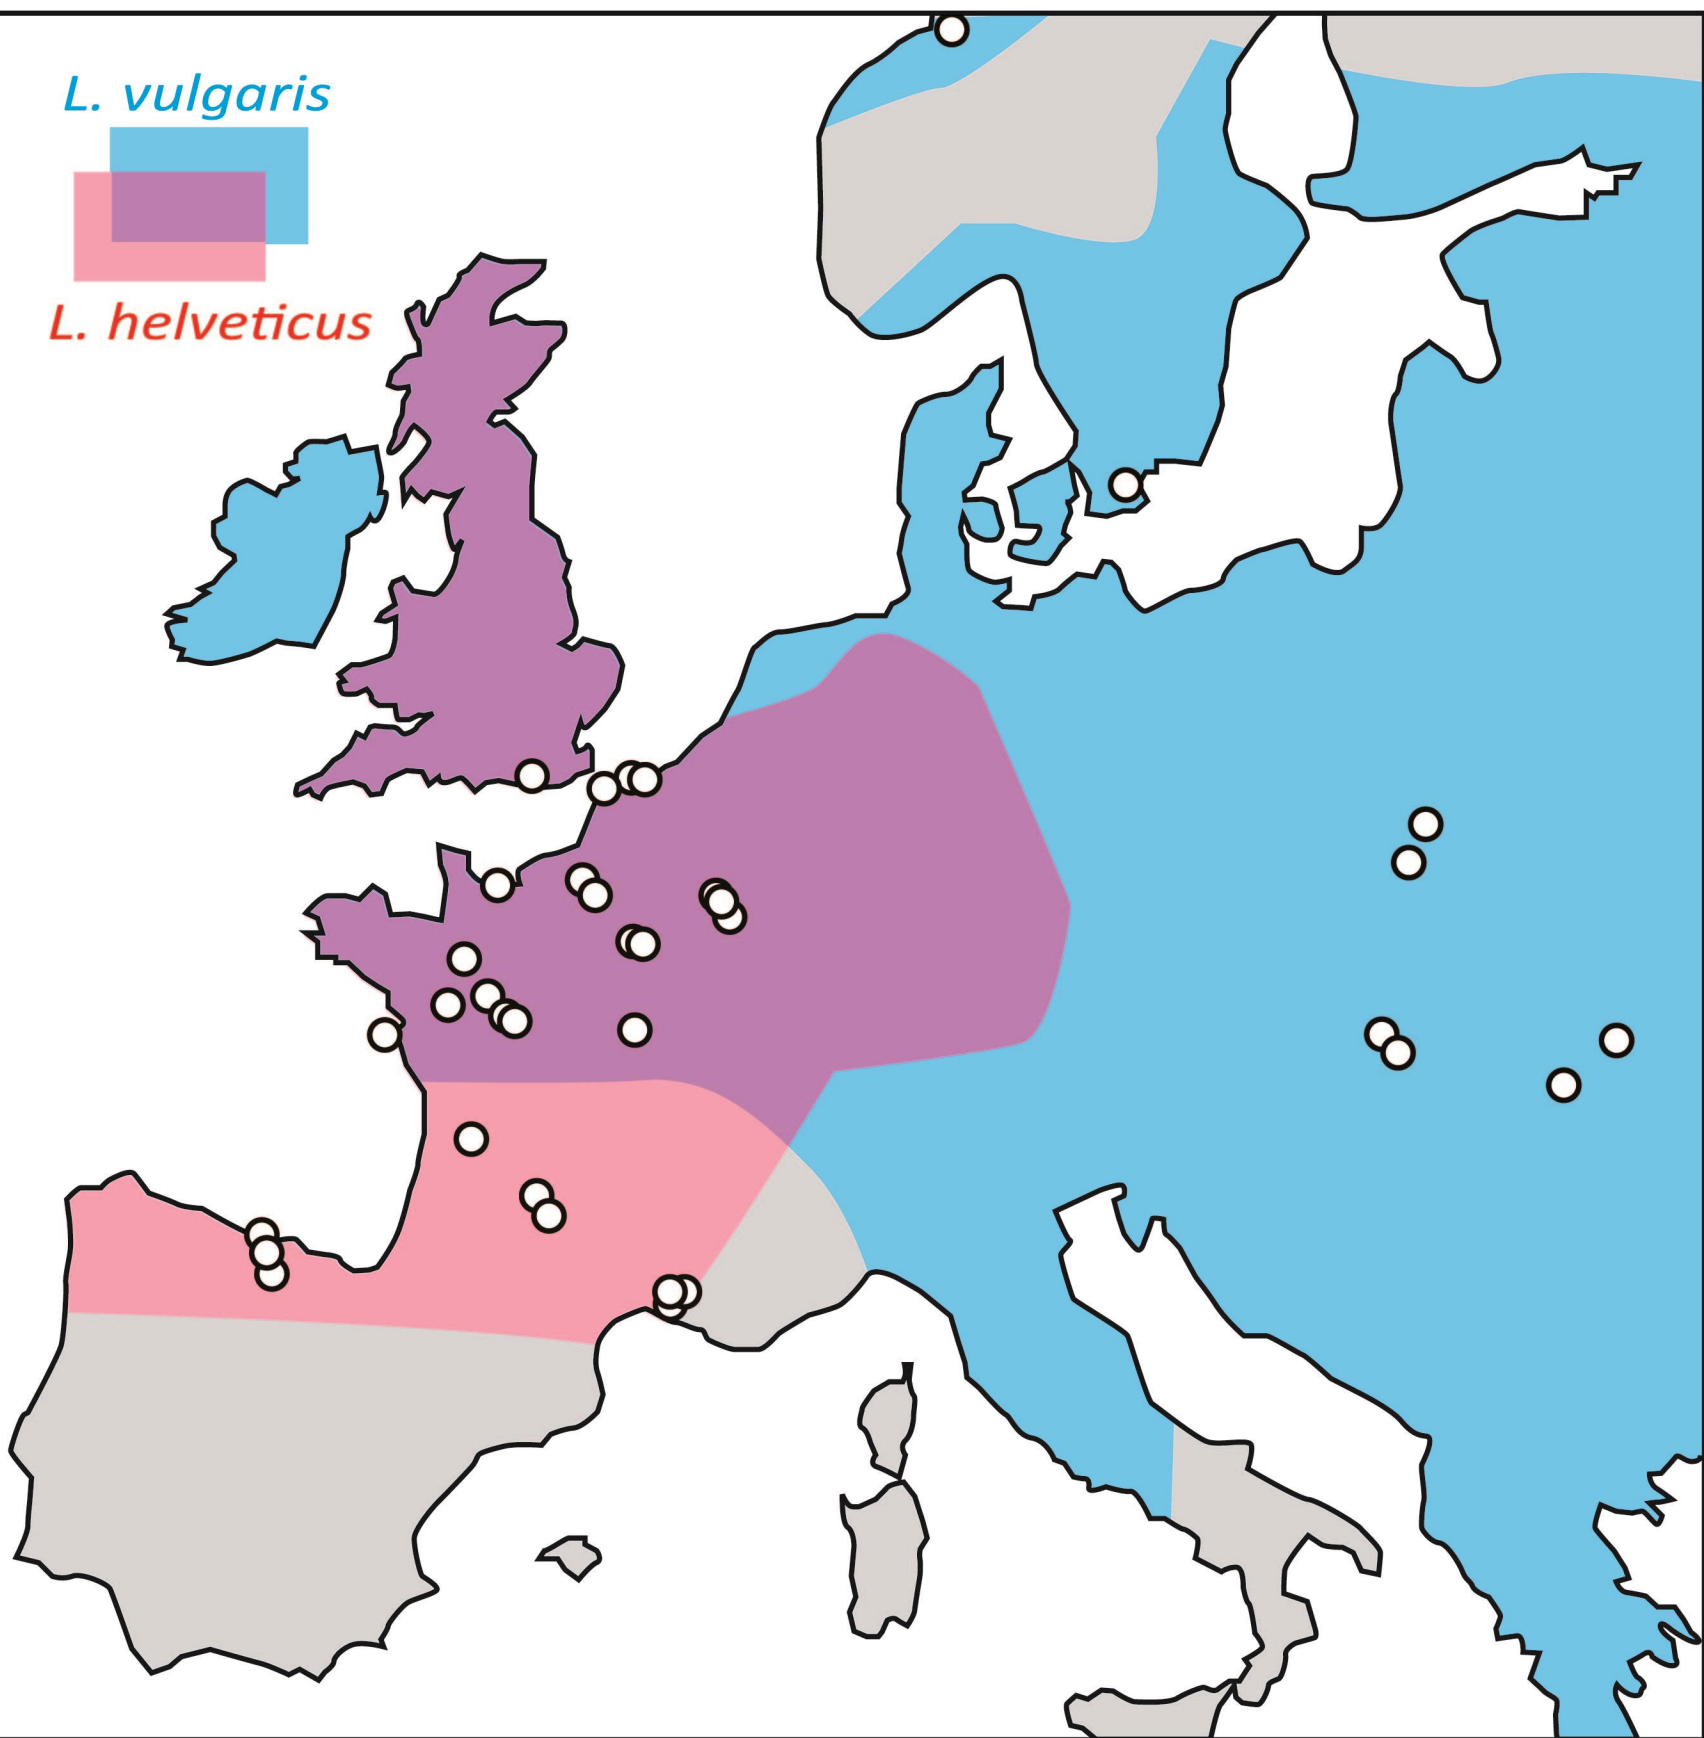

**A***L. helveticus**L. vulgaris*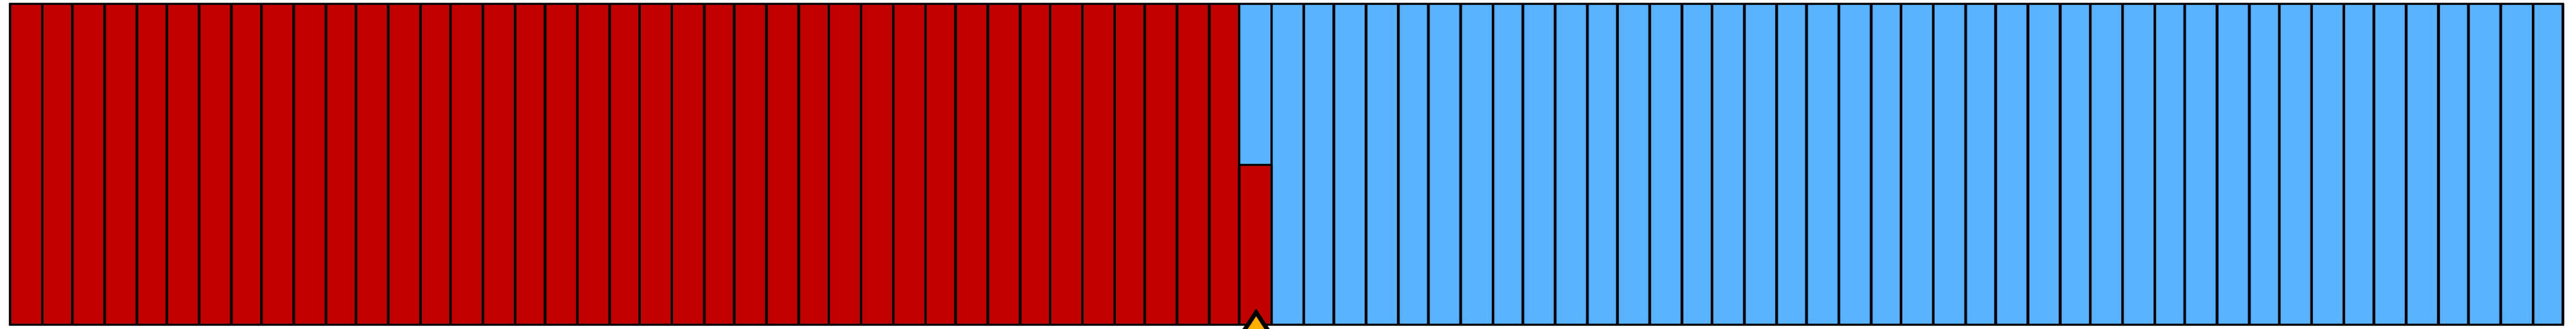

Sampling from Ecordal, North East of France

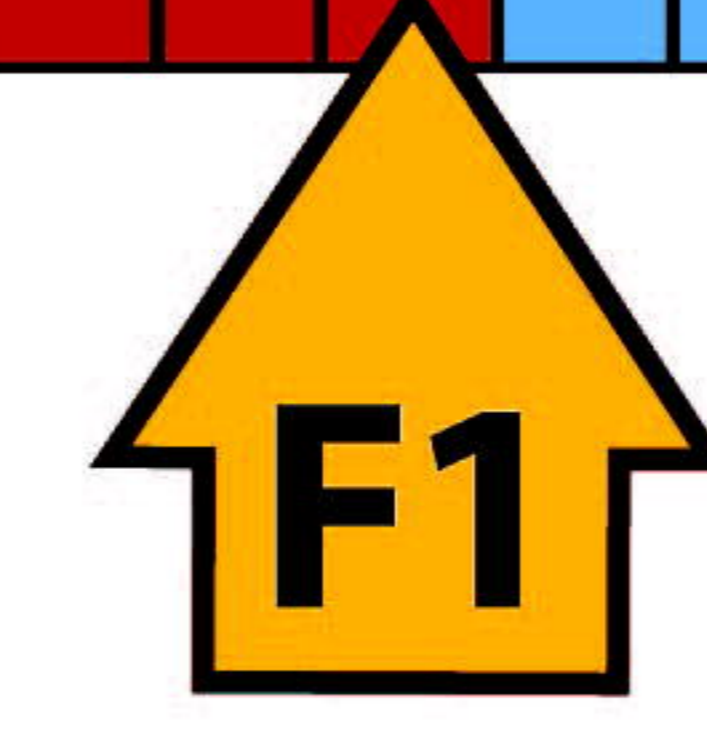**Allotopy****Syntopy****Allotopy****Microsat.****B****SNP**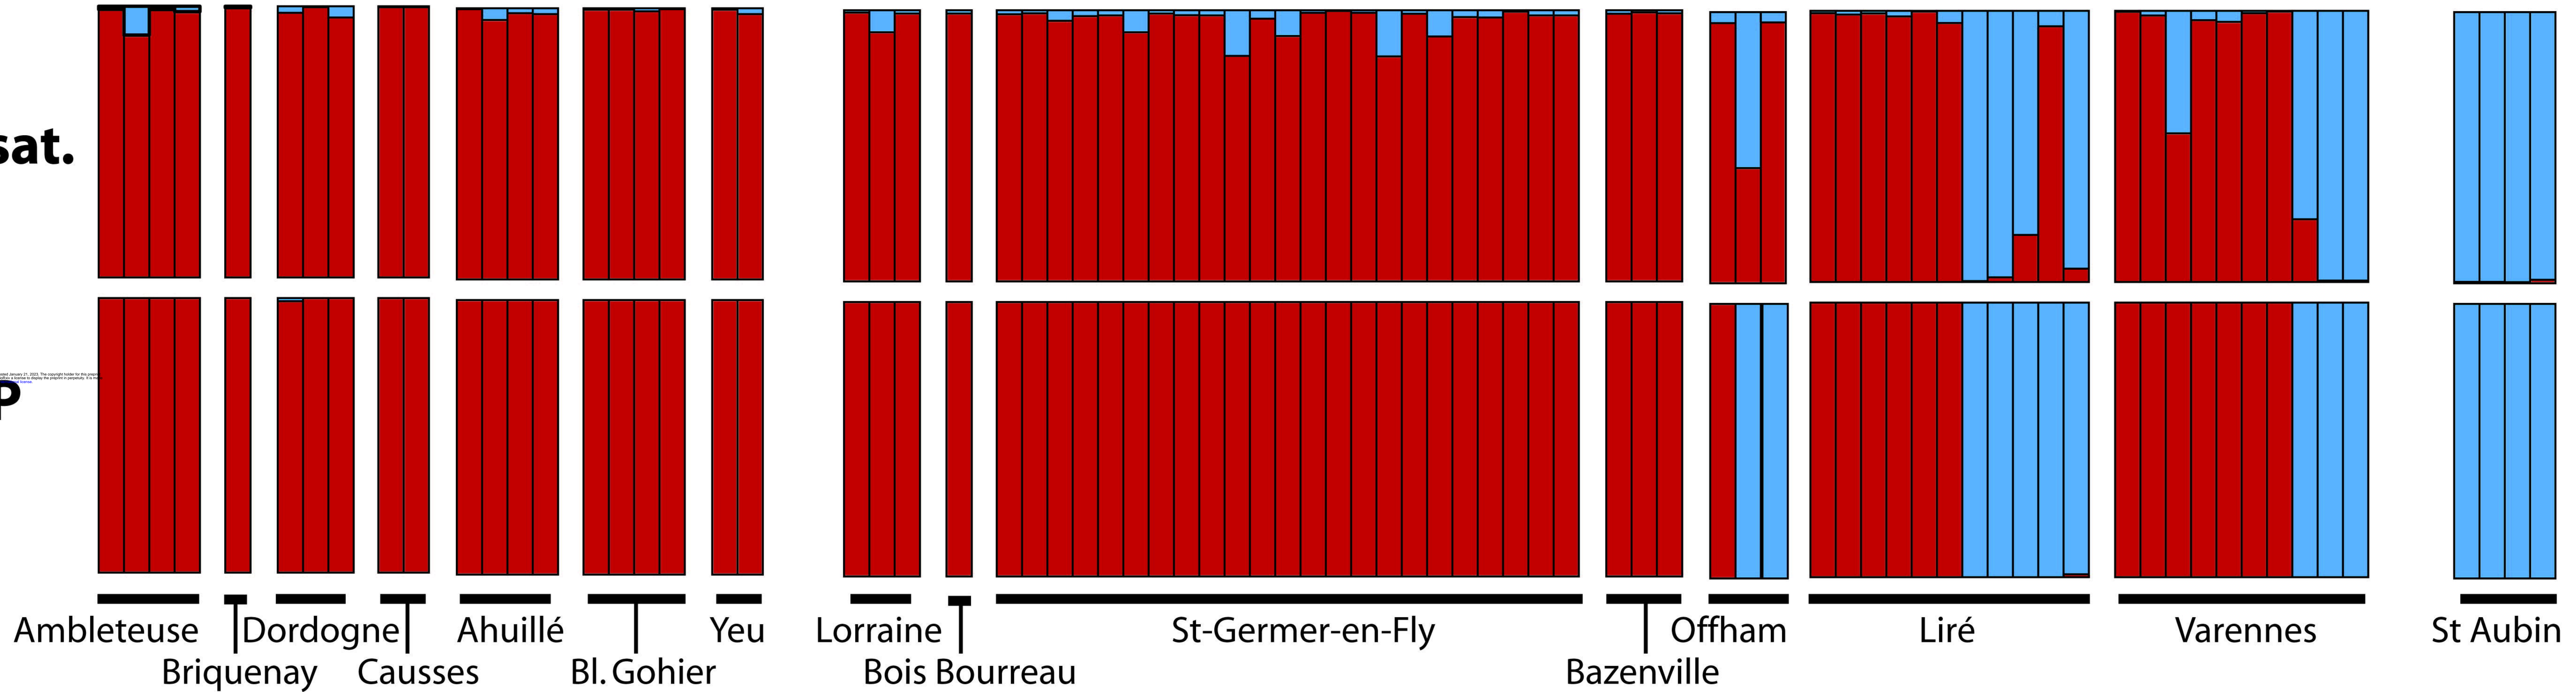

Ambleteuse

Briquenay

Dordogne

Causes

Ahuillé

Bl. Gohier

Yeu

Lorraine

Bois Bourreau

St-Germer-en-Fly

Bazenville

Offham

Liré

Varennes

St Aubin
